# Supplementary material for: β-Glucan Oligosaccharide EnhancesCD8+T Cells Immune Response Induced by a DNA Vaccine Encoding Hepatitis B Virus Core Antigen
Source: Hindawi journal article supplement (doi:10.1155/2010/645213), 2010-01-01

## **Figure legend**

### **Figure 1 Effect of $\beta$ -glu6 on pB144-induced recruitment of CD4<sup>+</sup> T cells**

Mice were immunized with  $\beta$ -glu6 (G), pB144, pB144+G, or PBS as described in Materials and Methods. Five days after priming (A) and five days after boosting (B), CD4<sup>+</sup> T cells were evaluated in liver lymphocytes and peripheral blood mononuclear cells (PBMC). The percentage of CD4<sup>+</sup> T cells is indicated in the upper right corner of each panel. Data are expressed as mean of 3 mice/group.

### **Figure 2 Effect of $\beta$ -glu6 on pB144-induced recruitment of CD8<sup>+</sup> T cells**

Mice were immunized with  $\beta$ -glu6 (G), pB144, pB144+G, or PBS, as described in Materials and Methods. Five days after priming (A) and five days after boosting (B), the percentage of CD8<sup>+</sup> T cells was evaluated in PBMC and in liver lymphocytes. Data are expressed as mean  $\pm$  SD of 3 mice/group.

**Fig. 1**

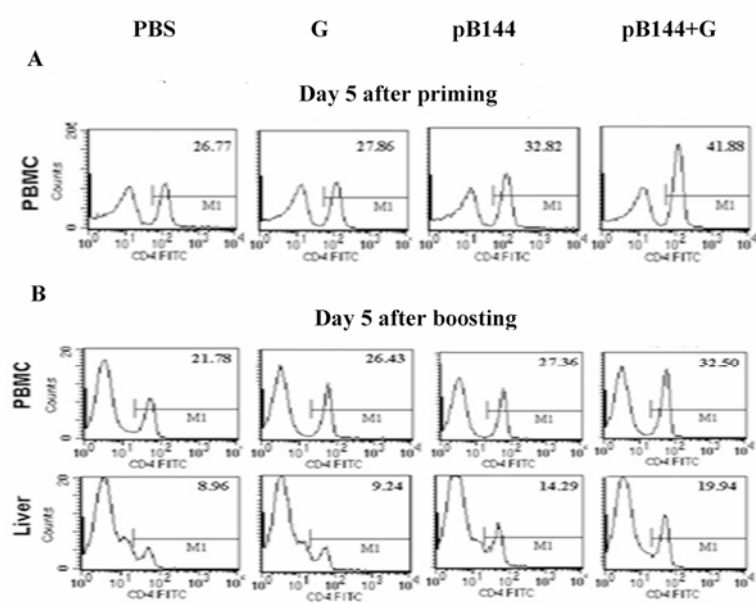

**Fig. 2**

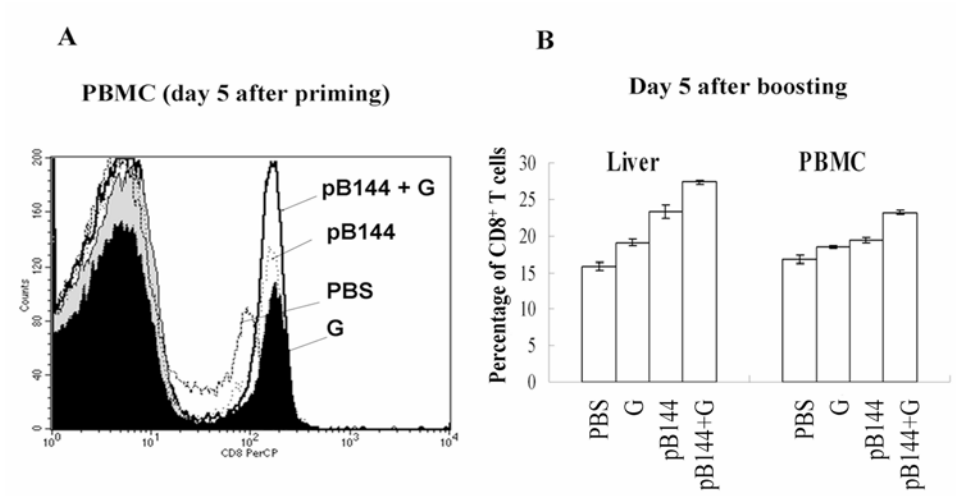

Supplement: f1 [file 645213.f1.pdf]
